# Supplementary material
Source: publisher site journal article supplement (https://static.cambridge.org/content/id/urn:cambridge.org:id:article:S2040174419000801/resource/name/S2040174419000801supp002.docx)
Supplement: Supplementary file 1 [file S2040174419000801supp002.docx]

**Supplementary Table 1.** Additional maternal and fetal characteristics of the study population

| **Characteristics of Study Participants** | **Mean ± SD or n (%)** | | |
| --- | --- | --- | --- |
| **Female offspring (n=149)** | **Male offspring (n=152)** | **Combined (n=301)** |
| Married, n (%) | 116 (77.9) | 110 (72.4) | 226 (75.1) |
| ≤12 years of education, n (%) | 48 (32.2) | 45 (29.7) | 93 (30.9) |
| Medically Insured, n (%) | 90 (60.4) | 94 (61.8) | 184 (61.1) |
| Private Insurance Holder vs Medicaid, n (%) | 79 (56.0) | 71 (50.4) | 150 (53.2) |
| Smoked cigarettes in the past 6 mo, n (%) | 0 (0) | 0 (0) | 0 (0) |
| Consumed alcoholic beverage in the past week, n (%) | 1 (0.7) | 1 (0.7) | 2 (0.7) |
| Gravidity, n (%) |  |  |  |
| 1 | 49 (32.9) | 54 (35.5) | 103 (34.2) |
| 2 | 48 (32.2) | 48 (31.6) | 92 (32.0) |
| ≥3 | 52 (34.9) | 50 (32.9) | 102 (34.0) |
| Nulliparous, n (%) | 68 (45.6) | 72 (47.4) | 140 (46.5) |
| Mode of Onset of Labor, n (%) |  |  |  |
| C-section (no labor) | 29 (19.5) | 30 (19.7) | 59 (19.6) |
| Spontaneous | 80 (53.7) | 66 (43.4) | 146 (48.5) |
| Induced | 40 (26.9) | 56 (36.8) | 96 (31.9) |
| Preeclamptic, n (%) | 4 (2.7) | 4 (2.6) | 8 (2.7) |
| Maternal Ancestry Proportions |  |  |  |
| East Asian among Asian/Pacific Islander | 0.81 ± 0.29 | 0.77 ± 0.31 | 0.78 ± 0.30) |
| European among White/non-Hispanic | 0.94 ± 0.12 | 0.94 ± 0.12 | 0.94 ± 0.12 |
| European among Black/non-Hispanic | 0.15 ± 0.12 | 0.22 ± 0.14 | 0.18 ± 0.13 |
| European among Hispanic | 0.49 ± 0.21 | 0.47 ± 0.18 | 0.48 ± 0.19 |
| African among Black/non-Hispanic | 0.82 ± 0.12 | 0.75 ± 0.15 | 0.79 ± 0.14 |
| African among Hispanic | 0.19 ± 0.17 | 0.20 ± 0.17 | 0.19 ± 0.17 |
| Native American among Hispanic | 0.30 ± 0.27 | 0.31 ± 0.21 | 0.30 ± 0.24 |
| Fetal Ancestry Proportions | - | - | - |
| East Asian among Asian/Pacific Islander | 0.76 ± 0.30 | 0.71 ± 0.33 | 0.74 ± 0.32 |
| European among White/non-Hispanic | 0.92 ± 0.15 | 0.89 ± 0.17 | 0.91 ± 0.16 |
| European among Black/non-Hispanic | 0.16 ± 0.11 | 0.23 ± 0.15 | 0.19 ± 0.13 |
| European among Hispanic | 0.48 ± 0.19 | 0.49 ± 0.18 | 0.48 ± 0.19 |
| African among Black/non-Hispanic | 0.81 ± 0.13 | 0.73 ± 0.17 | 0.78 ± 0.15 |
| African among Hispanic | 0.22 ± 0.19 | 0.19 ± 0.17 | 0.21 ± 0.18 |
| Native American among Hispanic | 0.28 ± 0.25 | 0.29 ± 0.22 | 0.28 ± 0.23 |
| Placental DNA methylation age, wk | 35.7 ± 1.6 | 35.6 ± 1.4 | 35.7 ± 1.5 |
| Placental DNA methylation age acceleration, wk | -3.9 ± 1.8 | -3.8 ± 1.6 | -3.8 ± 1.7 |
